# Supplementary material for: Phylogenetic analysis of endogenous viral elements in the rice genome reveals local chromosomal evolution in Oryza AA-genome species
Source: Front Plant Sci. 2023 Oct 27;14:1261705. doi: 10.3389/fpls.2023.1261705 (PMC10641527; doi:10.3389/fpls.2023.1261705)
Supplement: Supplementary file 1 [file Table_1.xlsx]

## Sheet: Supplementary Table 1
	Supplementary Table 1 The positions and lengths of eRTBVL-D sequences in Oryza AA-genome species*
	ID	O. sativa ssp. japonica					O. sativa ssp. indica**					O. rufipogon					O. glaberrima
		Chr	Start	End	Length	Strand	Chr	Start	End	Length	Sence	Chr	Start	End	Length	Strand	Chr	Start	End	Length	Strand
	d1	1	5193920	5194407	488	＋	1	5290026	5290512	487	＋	1	4757193	4757679	487	＋	1	4154711	4155109	399	＋
	d2	1	5194744	5195008	265	＋	1	5290849	5291113	265	＋	1	4758016	4758280	265	＋		Deleted*			＋
	d3	1	5195124	5198055	2932	＋	1	5291228	5294159	2932	＋	1	4758395	4761331	2937	＋	1	4155410	4158083	2674	＋
	d4	2	12120385	12120601	217	＋	2	12319652	12319868	217	＋	2	11229018	11229234	217	＋	ND
	d5	2	12120644	12121245	602	－	2	12319911	12320512	602	－	2	11229277	11229878	602	－	ND
	d6	4	18488307	18488450	144	＋	4	17481205	17481346	142	＋	4	14730131	14730273	143	＋	4	11186433	11186575	143	＋
	d7	4	18488544	18488674	131	－	4	17481442	17481572	131	－	4	14730369	14730499	131	－	4	11186668	11186799	132	－
	d8	4	21097520	21097778	259	－	4	20464869	20465127	259	－	4	17280374	17280631	258	－	4	13690391	13690644	254	－
	d9	5	6506720	6507050	331	－	5	6544418	6544748	331	－	5	5838059	5838389	331	－	Deleted*
	d10	7	8906209	8907980	1772	＋	7	8659380	8664699	5320	＋	7	8096430	8101787	5358	＋	7	7642657	7648227	5571	＋
	d11	7	8909007	8920257	11251	－	7	8665267	8676319	11053	－	7	8102844	8113944	11101	－	7	7662915	7673393	10479	－
	d12	9	16726920	16727025	106	＋	9	15848884	15848989	106	＋	9	14423721	14423826	106	＋	9	12218973	12219078	106	＋
	d13	10	9099571	9099688	118	－	10	8894585	8894702	118	－	10	7953593	7953710	118	－	Deleted*
	d14	11	5069912	5072964	3053	＋	11	5391598	5392179	582	＋	11	4617423	4618004	582	＋	Oglab11_unplaced045	205	3284	3080	＋
	d15	11	11654495	11657114	2620	－	11	11879939	11882560	2622	－	11	11220479	11223106	2628	－	11	9061408	9063961	2554	－
	ID	O. barthii					O. glumaepatula					O. meridionalis					O. longistaminata					O. punctata
		Chr	Start	End	Length	Strand	Chr	Start	End	Length	Strand	Chr	Start	End	Length	Strand	Chr	Start	End	Length	Strand	Chr	Start	End	Length	Strand
	d1	Deleted*					1	5279656	5280128	473	＋	1	5261177	5261700	524	＋	KN538748	138171	138622		＋	ND
	d2	Deleted*					Deleted*					1	5262036	5262300	265		Deleted*					ND
	d3	1	4385375	4388227	2851	＋	1	5280432	5282642	2211	＋	1	5262415	5264151	1737	＋	1****	5039533	5042383	2849	＋			ND
	d4	2	11025428	11025644	217	＋	2	12220660	12220876	217	＋	ND					Deleted*					2*	12163130	12163321	192	＋
	d5	2	11025687	11026288	602	－	2	12220919	12221520	602	－	ND					Deleted*					2*	12164620	12165236	617	－
	d6	4	12208515	12208658	144	＋	4	15674968	15675110	143	＋	4	14452390	14452532	143	＋	4****	12251597	12251739	143	＋			ND
	d7	4	12208751	12208882	132	－	4	15675205	15675336	132	－	4	14452628	14452758	131	－	4****	12251833	12251963	131	－			ND
	d8	4	14694693	14694946	254	－	Deleted*					4	17044210	17044517	308	－	4****	14877184	14877441	258	－			ND
	d9	5	5433872	5434188	317	－	5	6588049	6588341	293	－	ND					5***	5522035	5522328	294	－			ND
	d10	7	7798798	7804120	5323	＋	1	39940422	39945744	5323	－	LONC01000297****	254106	259439	5334	－	ND					ND
	d11	7	7818783	7829197	10415	－	1	39912399	39939365	26967	＋		228171	253049	24879	＋	ND					ND
	d12	9	13332228	13332333	106	＋	9	16644418	16644523	106	＋	9	13756069	13756174	106	＋	9***	14346341	14346446	106	＋	9*	19642773	19642878	106	＋
	d13	10	7045450	7045567	118	－	10	8287131	8287247	117	－	10	5812893	5813010	118	－	10****	13820912	13821017	106	－			ND
	d14	11	4551560	4554632	3073	＋	11	4748694	4749289	596	＋	11	4423885	4423992	108	＋	11***	4400316	4400872	557	＋			ND
	d15	11	9891208	9893829	2622	－	11	11473849	11476492	2644	－	ND					11***	9393575	9395464	1890	－			ND
	* Each sequence position was referred by the genomic sequences obtained from Gramene (http://gramene.org/) except for O. sativa spp indica. The gray shaded sequences, d2, d8, d9, d12, and d13 were not applicable for the phylogenetic analyses due to the short lengths and lacking sequences. ND indicates element non-detected. ** All the genomic sequences in O. sativa spp indica were retrieved from t…

## Sheet: Supplementary Table　2
								i
Supplementary Table 2 Information on genes flanking the eRTBVL-D loci in Oryza AA-genome species (obtained from Gramene, http://gramene.org)
				O. sativa ssp. japonica						O. sativa ssp. indica				O. rufipogon			O. glaberrima			O. barthii			O. glumaepatula			O. meridionalis			O. longistaminata				O. punctata
				Flanking gene of eRTBVLs segment		gramene		The distance from eRTBV		gene_ID	gramene	v2Plus		gene_ID	gramene		gene_ID	gramene		gene_ID	gramene		gene_ID	gramene		gene_ID	gramene		gene_ID	gramene		gene_ID	gramene	OL_genome
d1-d3		Left		Os01g0195801		1: 5,149,335-5,150,341:+		43579, 44403, 44783		BGIOSGA002940	1:5,542,296-5,543,724:+	1:5239359-5240787:+		ND	ND		ORGLA01G0397100	Oglab01_unplaced002:4,132-5,579:+		OBART01G06120	1:4,362,673-4,364,985:+		OGLUM01G06690	1:5,225,909-5,227,544:+		OMERI01G06280	1:5,210,844-5,214,064:+		ND	ND		ND	ND	-
		Right2		Os01g0196300		1: 5,201,862-5,203,996:+		7455, 6854, 3807		BGIOSGA002943	1:5,598,865-5,600,573:+	1:5298194-5299902:+		ORUFI01G06710	1:4,765,164-4,767,170:+		ORGLA01G0058200	1:4,161,901-4,163,606:+		OBART01G06170	1:4,391,890-4,393,607:+		OGLUM01G06730	1:5,307,824-5,309,541:+		OMERI01G06310	1:5,269,585-5,271,564:+		ND	ND		OPUNC01G05940	1:4,518,287-4,534,356:+	-
d4-d5		Left		Os02g0308400		2: 12,113,907-12,114,966:-		5419, 5678		BGIOSGA006614	2:12,920,636-12,921,439:-	2:12312483-12313286:-		ORUFI02G13950	2:11,222,821-11,223,624:-		ND	ND		OBART02G13770	2:11,019,490-11,020,341:-		OGLUM02G13650	2:12,214,522-12,215,325:-		ND	ND		KN540715.1_FG001	KN540715.1:36,633-38,097:+		OPUNC02G12210	2:12,144,025-12,144,813:-	-
		Right		Os02g0308800		2: 12,127,913-12,129,233:-		7312, 6668		ND	ND	ND		ORUFI02G13970	2:11,236,928-11,237,734:-		ORGLA02G0121500	2:10,596,792-10,597,598:-		OBART02G13790	2:11,032,848-11,033,711:-		OGLUM02G13660	2:12,228,689-12,229,495:-		ND	ND		KN540715.1_FG003	KN540715.1:29,080-30,069:+		OPUNC02G12230	2:12,177,464-12,178,273:-	-
d6-d7		Left2		Os04g0378200		4: 18,468,243-18,473,626:+		14681		*BGIOSGA027847	8:415,571-417,553:+	4:406941-408923:+		ORUFI04G10880	4:14,701,139-14,706,241:+		ORGLA04G0069700	4:11,134,896-11,139,127:+		OBART04G09810	4:12,157,728-12,162,840:+		OGLUM04G09470	4:15,658,702-15,664,305:+		OMERI04G09090	4:14,412,456-14,418,106:+		KN539202.1_FG006	KN539202.1:18,038-23,128:-		OPUNC04G07910	4:16,025,341-16,031,153:+	-
		Right		Os04g0378575		4: 18,490,353-18,494,159:+		1903, 1679		BGIOSGA016228	4:15,948,469-15,952,275:+	4:17483257-17487063:+		ORUFI04G10900	4:14,732,181-14,735,987:+		ORGLA02G0344000	ADWL01005695.1:624-2,750:+		OBART04G09860	4:12,210,307-12,214,099:+		OGLUM04G09480	4:15,677,379-15,681,187:+		OMERI04G09120	4:14,454,430-14,460,826:+		KN539202.1_FG011	KN539202.1:1,794-5,600:-		ND	ND	-
d8		Left		Os04g0425100		4: 21,001,722-21,010,737:+		86783		BGIOSGA016418	4: 18,846,334-18,853,763	4:20364069-20371498		ORUFI04G13880	4:17,198,789-17,205,317:+		ORGLA04G0096900	4:13,631,890-13,637,638:+		OBART04G12720	4:14,601,804-14,610,838:+		OGLUM04G12440	4:18,450,721-18,459,493:+		OMERI04G11360	4:16,908,287-16,918,810:+		KN542677.1_FG001	KN542677.1:570-6,312:-		OPUNC04G10670	4:18,803,102-18,812,291:+	-
		Right2		Os04g0428300		4:21,207,698-21,208,285:+		110178		BGIOSGA016422	4: 19,112,498-19,113,757	4:20585589-20586848		ND	ND		ND	ND		OBART04G12740 OBART04G12800	4:14,646,912-14,648,183:- 4:14,769,621-14,770,915:+		ND	ND		OMERI04G11380	4:16,952,135-16,953,361:-		KN540456.1_FG001	KN540456.1:10,703-13,708:-		ND	ND	-
d9		Left		Os05g0203900		5: 6,468,141-6,476,455:-		8332		BGIOSGA018620	5:6,730,218-6,733,145:-	5:6506327-6509254:-		ORUFI05G07110	5:5,789,582-5,799,014:-		ND	ND		OBART05G06610	5:5,388,426-5,395,969:-		OGLUM05G06910	5:6,535,237-6,544,348:-		ND	ND		KN539363.1_FG002	KN539363.1:22,846-28,841:-		OPUNC05G06220	5:7,247,320-7,253,539:-	5:5247150-5249809:-
		Right		Os05g0204600		5: 6,514,746-6,517,280:+		7696		BGIOSGA019342	5:6,777,434-6,778,939:+	5:6552673-6554178:+		ORUFI05G07170	5:5,846,088-5,848,621:+		ND	ND		OBART05G06680	5:5,442,269-5,443,466:+		OGLUM05G06980	5:6,600,562-6,603,866:+		OMERI05G05910	5:6,012,125-6,019,884:+		ND	ND		OPUNC05G06230	5:7,303,497-7,305,737:+	5:5285352-5287326:+
d10-d11		Left		Os07g0257200		7: 8,871,643-8,878,905:-		27304, 30102		BGIOSGA024510	7:8,883,713-8,890,474:-	7:8627398-8634159:-		ORUFI07G09370	7:8,065,847-8,072,635:-		ORGLA07G0078500	7:7,601,244-7,607,887:-		OBART07G09270	7:7,758,670-7,764,800:-		OGLUM01G41870	1:39,965,419-39,973,084:+		OMERI07G07630	7:8,036,309-8,043,958:-		KN541118.1_FG001	KN541118.1:23,527-31,014:-		OPUNC07G08650	7:9,505,076-9,511,479:-	-
		Right		Os07g0258000		7: 8,926,134-8,928,872:+		18154, 5877		ND	ND	ND		ORUFI07G09390	7:8,119,821-8,122,749:+		ORGLA07G0078800	7:7,679,419-7,681,845:+		OBART07G09310	7:7,834,656-7,837,647:+		*OGLUM07G08390	7:8,170,930-8,173,565:+		ND	ND		ND	ND		ND	ND	-
d12		Left		Os09g0447500		9: 16,718,633-16,720,923:-		5997		BGIOSGA029663	9:15,266,334-15,268,285:-	9:15836065-15838016:-		ORUFI09G13070	9:14,415,795-14,417,744:-		ORGLA09G0091600	9:12,211,029-12,212,977:-		ND	ND		OGLUM09G12600	9:16,631,483-16,633,433:-		OMERI09G09720	9:13,745,883-13,748,710:-		KN538850.1_FG023	KN538850.1:62,043-64,542:+		OPUNC09G10680	9:19,635,952-19,637,551:-	5:12661957-12664391:-
		Right		Os09g0447600		9: 16,728,178-16,729,625:-		1153		BGIOSGA029662	9:15,280,743-15,281,858:-	12:15850474-15851589:-		ORUFI09G13080	9:14,425,325-14,426,441:-		ND	ND		OBART09G12170	9:13,334,012-13,334,860:-		OGLUM09G12610	9:16,646,008-16,647,768:-		ND	ND		KN538850.1_FG036	KN538850.1:51,060-57,619:+		OPUNC09G10690	9:19,646,610-19,654,234:-	9:12668766-12670201:-
d13		Left2		Os10g0326900		10:9,088,337-9,090,418:-		11234		BGIOSGA032140	10: 7,466,884-7,472,982:-	10:8883321-8889418:-		ORUFI10G06190	10:7,942,307-7,958,996:-		ORGLA10G0048700	10:6,997,079-7,003,180:-		OBART10G05860	10:7,034,211-7,050,625:-		OGLUM10G05750	10:8,265,184-8,275,687:-		OMERI10G04220	10:5,801,062-5,818,299:-		KN540473.1_FG006	KN540473.1:9,599-15,265:-		OPUNC10G05230	10:10,278,766-10,286,357:-	-
		Right		Os10g0327000		10: 9,101,768-9,104,973:-		2080		BGIOSGA032139	10:7,480,575-7,483,786:-	10:8896783-8899994:-		ND	ND		ORGLA10G0048800	10:7,007,870-7,011,075:-		ND	ND		OGLUM10G05760	10:8,288,515-8,291,579:-		ND	ND		KN540473.1_FG007	KN540473.1:27,580-30,407:-		OPUNC10G05240	10:10,308,575-10,312,256:-	-
d14		Left2		Os11g0200600		11: 5,059,892-5,063,060:+		10020		BGIOSGA030692	9:11,823,605-11,825,537:+	11:5376682-5378614:-		ORUFI11G05930 ORUFI11G05940	11:4,611,928-4,615,055:+ 11:4,612,166-4,615,055:+		ORGLA11G0054600	11:4,157,150-4,158,259:+		**OBART11G05910	11: 4,533,897-4,549,336:+		OGLUM11G05640	11:4,714,145-4,716,520:+		ND	ND		KN538683.1_FG169	KN538683.1:661,906-664,012:+		ND	ND
		Right2		Os11g0202000		11: 5,153,098-5,156,354:+		80134		BGIOSGA003295	1:11,319,223-11,326,804:+	11:5471217-5478798:-		ND	ND		ND	ND		OBART11G05990	11:4,630,524-4,633,261:-		OGLUM11G05770	11:4,832,894-4,852,323:-		ND	ND		ND	ND		OPUNC11G06000	11:5718841-5726809:-	11:4658840-4662035:-
d15		Left		Os11g0307300		11: 11,650,220-11,651,887:-		2608		BGIOSGA034101	11:10,453,094-10,454,377:-	11:11875976-11877259:-		ORUFI11G11350	11:11,216,370-11,217,653:-		ORGLA11G0092500	11:9,057,475-9,058,758:-		OBART11G10720	11:9,887,242-9,888,525:-		OGLUM11G10680	11:11,469,872-11,471,156:-		*OMERI12G14100	12:19,048,795-19,050,532:+		KN539503.1_FG001	KN539503.1:5,836-7,115:+		OPUNC11G09730	11:12,548,134-12,549,527:-	11:9282588-9284253:-
		Right		Os11g0307500		11: 11,661,330-11,662,253:+		4216		BGIOSGA035175	11:10,474,431-10,480,033:+	11:11893686-11898084:+		ORUFI11G11360	11:11,227,126-11,228,517:+		ORGLA11G0092700	11:9,068,311-9,069,041:+		OBART11G10730	11:9,897,852-9,899,258:+		OGLUM11G10690	11:11,480,453-11,481,884:+		ND	ND		ND	ND		ND	-	ND
Orthologous genes were obtained from Gramene database (Plant Genes 66).
ND indicates no orthologous gene identified.
* The genes were not included in phylogenetic analysis because their positions are not adjacent to ERTBVs.
** An antisense gene (OBART11G05930) was annotated as ortholog in Gramene. Thus, corresponding sense gene (OBART11G05910) was used instead.

## Sheet: Supplementary Table 3
Supplementary Table 3. Pairwise Jukes-Cantor distances vs. japonica for Type A loci
	d4		d5		d10		d11		d15		Zhu (2014)
		s.e.		s.e.		s.e.		s.e.		s.e.	synonymous	non-coding	intergenic
indica	0.00678738	0.00679511	0.0117386	0.00444557	0.0122452	0.00289218	0.0125388	0.00117685	0.004909	0.00173702	0.0071	0.005	0.0052
rufipogon	0	0	0.00333519	0.00235965	0.00135074	0.000955335	0.00109154	0.00034524	0.00675819	0.00203998	0.0073	0.0097	0.0054
glaberrima	0	0	-	-	0.0122452	0.00289218	0.0178816	0.00140918	0.00923089	0.00238711	0.0104	0.0079	0.006
barthii	0	0	0.00668528	0.00334639	0.0122452	0.00289218	0.0179934	0.00141365	0.00923089	0.00238711	0.0099	0.007	0.0063
glumaepatula	0.00678738	0.00679511	0.0151266	0.0050551	0.0108747	0.00272365	0.0147604	0.00127828	0.0104703	0.0025439	0.0139	0.0098	0.009
meridionalis	0.0416774	0.017138	0.0410359	0.00843614	0.0149937	0.00320478	0.0150942	0.00129288	0.0236093	0.00384538	0.363	0.0401	0.0221
# of sites	148		601		1482		9168		1635		-	-	-
The number of base substitutions per site between sequences are shown. Standard error estimate(s) are shown in every other column. Analyses were conducted using the Jukes-Cantor model [1]. All positions containing gaps and missing data were eliminated (complete deletion option). Evolutionary analyses were conducted in MEGA X [2][3].
1. Jukes T.H. and Cantor C.R. (1969). Evolution of protein molecules. In Munro HN, editor, Mammalian Protein Metabolism, pp. 21-132, Academic Press, New York.
2. Kumar S., Stecher G., Li M., Knyaz C., and Tamura K. (2018). MEGA X: Molecular Evolutionary Genetics Analysis across computing platforms. Molecular Biology and Evolution 35:1547-1549.
3. Stecher G., Tamura K., and Kumar S. (2020). Molecular Evolutionary Genetics Analysis (MEGA) for macOS. Molecular Biology and Evolution (https://doi.org/10.1093/molbev/msz312).
